# Supplementary material for: Genotypic and Phenotypic Resistance to Clarithromycin in Helicobacter pylori Strains
Source: PubMed Central journal article supplement (PMC7356929; doi:10.3390/jcm9061930), 2020-06-19
Supplement: jcm-09-01930-s001.pdf [file jcm-09-01930-s001.pdf]

**Supplementary Table S1.** Frequency of mutations in the 23S rRNA gene of 46 *H. pylori* strains according to the phenotypic resistance against clarithromycin before and after unsuccessful eradication therapy.

| Position*         | Susceptible<br>(n = 8) | Resistant         |                                |                                  |
|-------------------|------------------------|-------------------|--------------------------------|----------------------------------|
|                   |                        | Total<br>(n = 38) | Primary resistance<br>(n = 14) | Secondary resistance<br>(n = 24) |
| 387G>A (383)      | 0                      | 1 (2.6)           | 1 (7.1)                        | 0                                |
| 471T>G (467)      | 3 (37.5)               | 13 (34.2)         | 3 (21.4)                       | 10 (41.7)                        |
| 496A>G (492)      | 0                      | 1 (2.6)           | 0                              | 1 (4.2)                          |
| 512C>T (508)      | 1 (12.5)               | 7 (18.4)          | 2 (14.3)                       | 5 (20.8)                         |
| 724A>G (720)      | 4 (50.0)               | 11 (28.9)         | 4 (28.6)                       | 7 (29.2)                         |
| 762_763insT (758) | 3 (37.5)               | 11 (28.9)         | 4 (28.6)                       | 7 (29.9)                         |
| 763A>T (759)      | 1 (12.5)               | 23 (60.5)         | 10 (71.4)                      | 13 (54.2)                        |
| 764C>T (760)      | 0                      | 10 (26.3)         | 5 (35.7)                       | 5 (20.8)                         |
| 808C>T (804)      | 2 (25.0)               | 2 (5.3)           | 0                              | 2 (8.3)                          |
| 870G>A (866)      | 1 (12.5)               | 1 (2.6)           | 0                              | 1 (4.2)                          |
| 977C>T (973)      | 3 (37.5)               | 10 (26.3)         | 3 (21.4)                       | 7 (29.2)                         |
| 977C>A (973)      | 2 (25.0)               | 6 (15.8)          | 2 (14.3)                       | 4 (16.7)                         |
| 977C>G (973)      | 1 (12.5)               | 3 (7.9)           | 1 (7.1)                        | 2 (8.3)                          |
| 1027G>A (1023)    | 3 (37.5)               | 20 (52.6)         | 8 (57.1)                       | 12 (50.0)                        |
| 1516dupT (1512)   | 1 (12.5)               | 5 (13.2)          | 2 (14.3)                       | 3 (12.5)                         |
| 1517G>A (1513)    | 5 (62.5)               | 24 (63.2)         | 8 (57.1)                       | 16 (66.7)                        |
| 1550C>T (1546)    | 0                      | 2 (5.3)           | 0                              | 2 (8.3)                          |
| 1568C>T (1564)    | 2 (25.0)               | 16 (42.1)         | 6 (42.9)                       | 10 (41.7)                        |
| 1582C>T (1578)    | 1 (12.5)               | 0                 | 0                              | 0                                |
| 1583G>A (1579)    | 1 (12.5)               | 0                 | 0                              | 0                                |
| 1648T>C (1644)    | 8 (100.0)              | 29 (76.3)         | 10 (71.4)                      | 19 (79.2)                        |
| 1691T>C (1687)    | 8 (100.0)              | 38 (100.0)        | 14 (100.0)                     | 24 (100.0)                       |

|                |           |            |            |            |
|----------------|-----------|------------|------------|------------|
| 1705C>T (1701) | 0         | 4 (10.5)   | 2 (14.3)   | 2 (8.3)    |
| 1759C>T (1755) | 2 (25.0)  | 2 (5.3)    | 0          | 2 (8.3)    |
| 1825A>G (1821) | 8 (100.0) | 38 (100.0) | 14 (100.0) | 24 (100.0) |
| 1830G>A (1826) | 8 (100.0) | 38 (100.0) | 14 (100.0) | 24 (100.0) |
| 1834T>C (1830) | 8 (100.0) | 38 (100.0) | 14 (100.0) | 24 (100.0) |
| 2088C>G (2084) | 0         | 3 (7.9)    | 1 (7.1)    | 2 (8.3)    |
| 2146A>G (2142) | 0         | 2 (5.3)    | 0          | 2 (8.3)    |
| 2147A>G (2143) | 0         | 36 (94.7)  | 14 (100.0) | 22 (91.7)  |
| 2186T>C (2182) | 6 (75.0)  | 36 (94.7)  | 14 (100.0) | 22 (91.7)  |
| 2194T>C (2190) | 0         | 4 (10.5)   | 2 (9.1)    | 2 (8.3)    |
| 2227A>G (2223) | 1 (12.5)  | 0          | 0          | 0          |
| 2292C>T (2288) | 0         | 1 (2.6)    | 1 (7.1)    | 0          |
| 2439A>G (2434) | 0         | 7 (18.4)   | 4 (28.6)   | 3 (12.5)   |
| 2716T>C (2711) | 0         | 4 (10.5)   | 2 (14.3)   | 2 (8.3)    |
| 2764C>T (2759) | 2 (25.0)  | 4 (10.5)   | 0          | 4 (16.7)   |
| 2868G>A (2860) | 8 (100.0) | 36 (94.7)  | 12 (85.7)  | 24 (100.0) |
| 2921G>A (2913) | 8 (100.0) | 28 (73.7)  | 10 (71.4)  | 18 (75.0)  |
| 2924C>T (2916) | 1 (12.5)  | 13 (34.2)  | 6 (42.9)   | 7 (29.2)   |
| 2926C>T (2918) | 0         | 5 (13.2)   | 2 (14.3)   | 3 (12.5)   |
| 2929T>C (2921) | 2 (25.0)  | 11 (28.9)  | 5 (35.7)   | 6 (25.0)   |

\*Numbers in the parenthesis indicate equivalent nucleotide position proposed by Taylor et al.

**Supplementary Table S2.** Assessment of linkage disequilibrium between mutations 2147A>G and 2186T>C in 23S rRNA gene.

| Haplotype | Frequency, % | Mutant:wild type (frequency, %) |             | P value |
|-----------|--------------|---------------------------------|-------------|---------|
|           |              | Susceptible                     | Resistant   |         |
| GC        | 73.9         | 0:8 (0)                         | 34:4 (89.5) | <0.001  |
| AC        | 17.4         | 6:2 (75.0)                      | 2:36 (5.3)  | <0.001  |
| GT        | 4.3          | 0:8 (0)                         | 2:36 (5.3)  | 0.507   |

AT 4.3 2:6 (25.0) 0:38 (0) 0.002

$D'$  0.361, LOD score 0.75,  $r^2$  0.045

$D'$ , linkage disequilibrium coefficient; LOD, log of the odds.

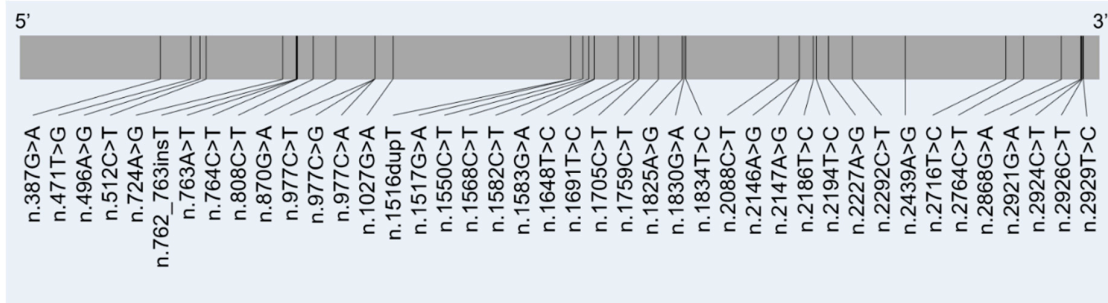

**Supplementary Figure S1.** Visually depicted location of mutations in 23S rRNA gene of 46 *H. pylori* strains. A total of 42 mutations were detected on 40 nonidentical loci.

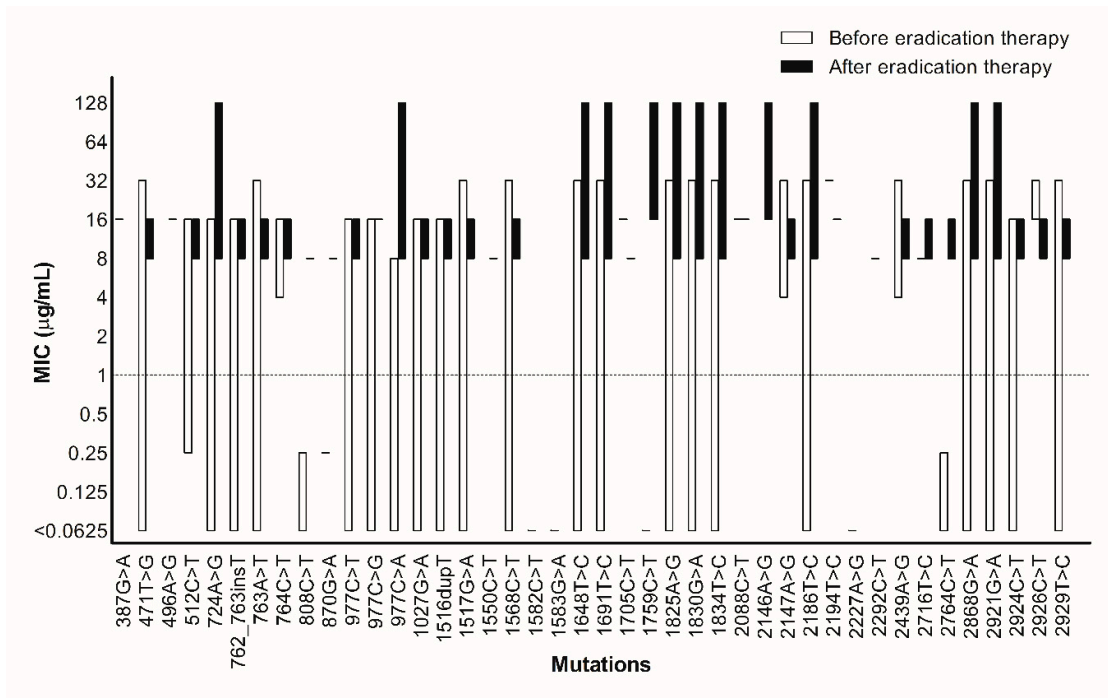

**Supplementary Figure S2.** Mutations in 23S rRNA gene at each nucleotide position and distribution of minimum inhibitory concentrations for clarithromycin before and after unsuccessful clarithromycin-containing triple therapy. Of note, 2147A>G mutation is found only in clarithromycin-resistant phenotype, with median MIC of 16  $\mu\text{g/mL}$  (range, from 4 to 32  $\mu\text{g/mL}$ ). The 2186T>C mutation is detected in both clarithromycin-susceptible and resistant phenotypes. MIC, minimum inhibitory concentration.
